# Supplementary material for: Prediction of size-resolved number concentration of cloud condensation nuclei and long-term measurements of their activation characteristics
Source: PubMed Central journal article supplement (PMC5517613; doi:10.1038/s41598-017-05998-3), 2017-07-19
Supplement: 41598_2017_5998_MOESM1_ESM.pdf [file 41598_2017_5998_MOESM1_ESM.pdf]

**Prediction of size-resolved number concentration of cloud  
condensation nuclei and long-term measurements of their activation  
characteristics**

H. C. Che<sup>1,2</sup>, X. Y. Zhang<sup>3,\*</sup>, L. Zhang<sup>1,2</sup>, Y. Q. Wang<sup>1</sup>, Y. M. Zhang<sup>1</sup>, X. J. Shen<sup>1</sup>, Q.  
L. Ma<sup>4</sup>, J. Y. Sun<sup>1,5</sup>, J. T. Zhong<sup>1</sup>

<sup>1</sup>Key Laboratory of Atmospheric Chemistry of CMA, Institute of Atmospheric Composition,  
Chinese Academy of Meteorological Sciences, Beijing 100081, China

<sup>2</sup>College of Earth Science, University of Chinese Academy of Sciences, Beijing 100049, China

<sup>3</sup>Chinese Academy of Meteorological Sciences, Beijing 100081, China & Center for Excellence in  
Regional Atmospheric Environment, IUN, CAS

<sup>4</sup>LinAn Regional Global Atmosphere Watch Station, LinAn 311307, China

<sup>5</sup>State Key Laboratory of Cryospheric Sciences, Cold and Arid Region Environmental and  
Engineering Research Institute, Chinese Academy of Sciences, Lanzhou 730000, China

Corresponding: X. Y. Zhang ([xiaoye@camsma.cn](mailto:xiaoye@camsma.cn))

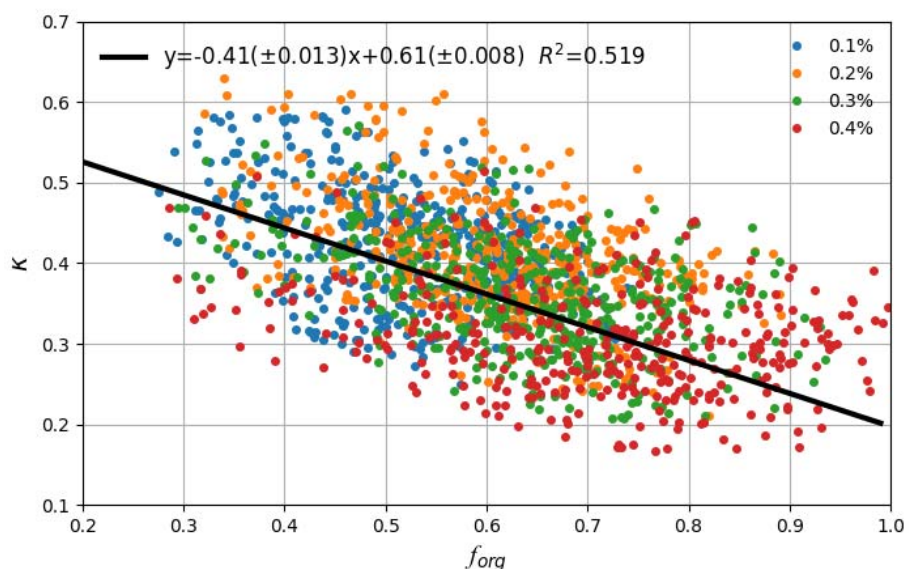

Figure S1. Correlation between the effective hygroscopicity parameter of CCN-active particles ( $\kappa_a$ ) observed at four different supersaturations and the organic mass fraction ( $f_{org}$ ) determined by size-resolved AMS measurements. The data were fitted by orthogonal distance regression with both 10 % relative error for measured  $\kappa_a$  and  $f_{org}$ .

As showed in the figure S1, the low correlation coefficient obtained with the size-resolved AMS data ( $R^2 = 0.52$ ) is a result of low signal-to-noise of these data. However, the fitting line generally showed the tendency of the relation of  $f_{org}$  with  $\kappa_a$ . The line fit equation for all data is  $y = -0.41(\pm 0.013)x + 0.61(\pm 0.008)$ , with standard deviations in brackets. Extrapolation of the fit line to  $x=1$  ( $f_{org}=1$ ) yields an effective hygroscopicity parameter of  $\kappa_{org} \approx 0.2 \pm 0.02$ , and to  $x=0$  ( $f_{org}=0$ ) yields an effective hygroscopicity parameter of  $\kappa_{inorg} \approx 0.61 \pm 0.008$ .
